# Supplementary material
Source: Royal Society of Chemistry journal article supplement (doi:10.1039/d6qi00798h)
Supplement: d6qi00798h1.pdf [file d6qi00798h1.pdf]

Supporting Information

**Superior photocatalytic hydrogen peroxide production over g-C<sub>3</sub>N<sub>4</sub> with  
Ni(OH)<sub>2</sub> as an oxidation**

Tao Ba, Qiang Li, Shangru Dong, Xueling Li, Longhui Nie\*, Xingru Chen, Jing

Wang\*

*(School of Materials and Chemical Engineering, Hubei University of Technology,  
Wuhan 430068, China)*

*\*Author to whom any correspondence should be addressed. E-mail:*

*nielonghui@mail.hbut.edu.cn (L. Nie) ; 2020102030087@whu.edu.cn (J. Wang)*

## 1 Experiment

### 1.1 Reagents:

Melamine, urea, potassium hydrogen phthalate ( $C_8H_5KO_4$ ), nickel acetate ( $Ni(CH_3COO)_2 \cdot 4H_2O$ ), sodium carbonate ( $Na_2CO_3$ ), silver nitrate ( $AgNO_3$ ), isopropanol (IPA), p-benzoquinone (BQ), and anhydrous ethanol ( $C_2H_5OH$ ) were purchased from Sinopharm. Potassium iodide (KI) was purchased from Macklin. All chemical reagents are of analytical purity and used directly without further purification.

### 2.2 Characterization.

The phase composition of the as-prepared catalysts was analyzed via an X-ray diffractometer (XRD, Empyrean, Netherlands) with a  $2\theta$  range of  $10\text{--}80^\circ$  and a scanning rate of  $5^\circ/\text{min}$ . The surface morphology of the samples was observed using a field emission scanning electron microscope (FESEM, ZEISS GeminiSEM 300, Germany) and a field emission transmission electron microscope (FETEM, FEI Tecnai G2 F30). The chemical composition and surface electronic states of the catalysts were investigated by X-ray photoelectron spectroscopy (XPS, Thermo Scientific K-Alpha, USA).  $N_2$  adsorption-desorption isotherms were measured on a Brunauer-Emmett-Teller (BET) analyzer (Micromeritics ASAP 2460) to evaluate the specific surface area and pore structure. The optical absorption properties of the photocatalysts were recorded on a UV-visible (UV-VIS) spectrophotometer (Shimadzu UV-2600) in the wavelength range of  $200\text{--}800\text{ nm}$ . The charge transfer and separation efficiency were assessed by a steady-state/transient photoluminescence (PL) spectrometer (FLS1000,

Edinburgh Instruments, UK).

### 2.3 Free radical and hole trapping experiments.

To elucidate the mechanism of photocatalytic H<sub>2</sub>O<sub>2</sub> production, active species trapping experiments were performed. Ethanol, AgNO<sub>3</sub>, benzoquinone (BQ), and isopropanol (IPA) were employed as quenchants to capture holes (h<sup>+</sup>), electrons, superoxide anion radicals (•O<sub>2</sub><sup>-</sup>), and hydroxyl radicals (•OH), respectively. Furthermore, •O<sub>2</sub><sup>-</sup> radicals were directly analyzed by electron paramagnetic resonance spectroscopy (EPR, Bruker ESR A300, Germany) at room temperature (298 K), using 5,5-dimethyl-1-pyrroline N-oxide (DMPO) as the spin-trapping agent.

### 2.4 Photoelectrochemical test.

The photoelectrochemical properties of the obtained samples were investigated using an electrochemical workstation (PGSTAT204, Metrohm Autolab) equipped with a standard three-electrode system, under the conditions of an open-circuit voltage of 0.6 V and a frequency range of 0.01–100,000 Hz. In this system, FTO glass served as the working electrode, 0.1 M Na<sub>2</sub>SO<sub>4</sub> aqueous solution as the electrolyte, a platinum wire electrode (approximately 1 cm × 1 cm) as the counter electrode, and a calomel electrode as the reference electrode (note: platinum electrode is typically used as counter electrode, corrected for rationality). All measurements were carried out under 420 nm visible-light irradiation, including electrochemical impedance spectroscopy (EIS), transient photocurrent response, and Mott-Schottky plots. The preparation procedure of the working electrode was as follows: 20 mg of the photocatalyst was

dispersed into a mixed solution consisting of 480  $\mu\text{L}$  ethanol and 20  $\mu\text{L}$  Nafion, followed by ultrasonication for 30 minutes to form a homogeneous suspension. Subsequently, 100  $\mu\text{L}$  of the suspension was uniformly coated onto a clean FTO glass substrate (effective area: 20  $\times$  20 mm) and dried at 60  $^{\circ}\text{C}$  to obtain the working electrode.

## 2.5 Apparent quantum yield (AQY) measurement

The apparent quantum yield (AQY) for the catalysts was tested under the same reaction conditions (using a 420 nm LED lamp as light source). AQY was calculated by the following Eq. (1) and (2):

$$\text{The number of incident photons (mol): } N = \frac{E\lambda}{hv} \quad (1)$$

$$\text{AQY} = \frac{2 \times H_2O_2 \text{ formed (mol)}}{N \text{ (mol)}} \times 100\% \quad (2)$$

## 2 Results

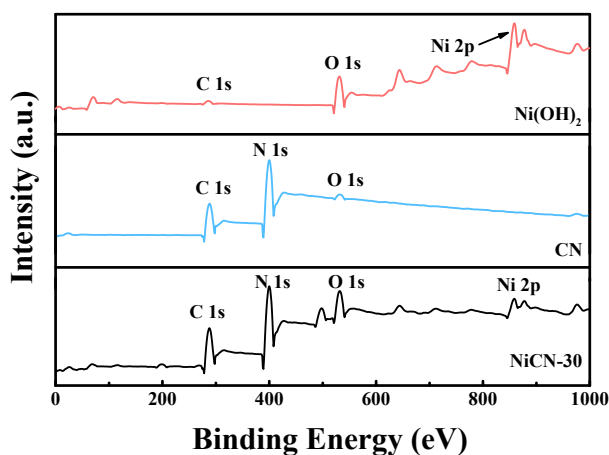

Fig. S1 XPS survey spectra for Ni(OH)<sub>2</sub>, CN, and NiCN-30

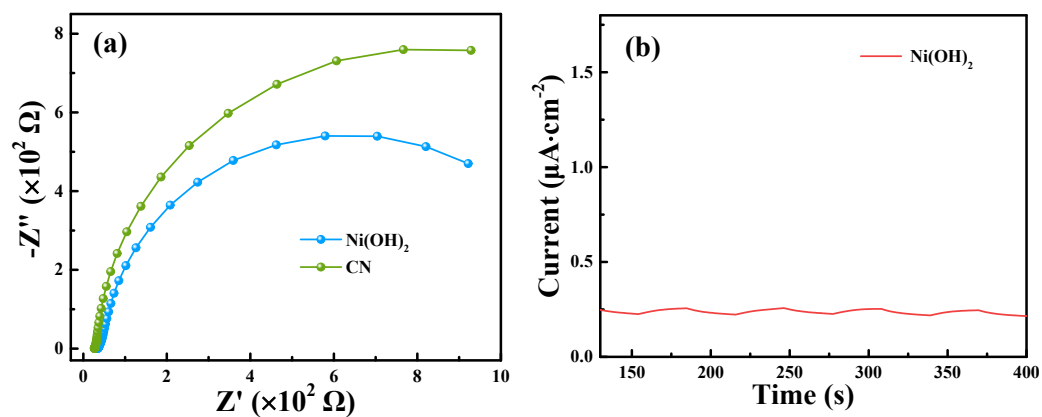

Fig. S2 EIS Nyquist plots (d) of CN and Ni(OH)<sub>2</sub> (a), photocurrent-time curve of Ni(OH)<sub>2</sub> (b).

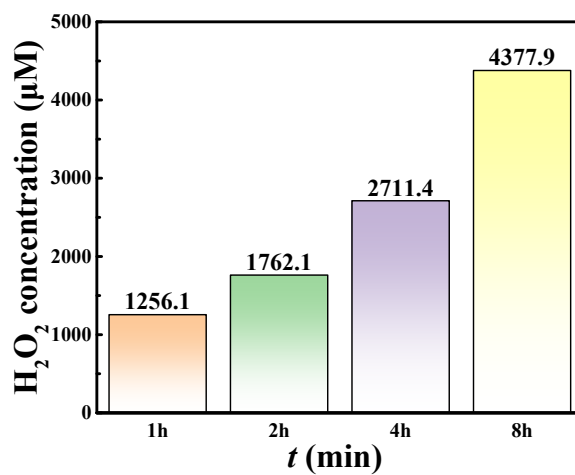

Fig. S3 The cumulative H<sub>2</sub>O<sub>2</sub> yield on NiCN-30 during 8 hours of continuous irradiation

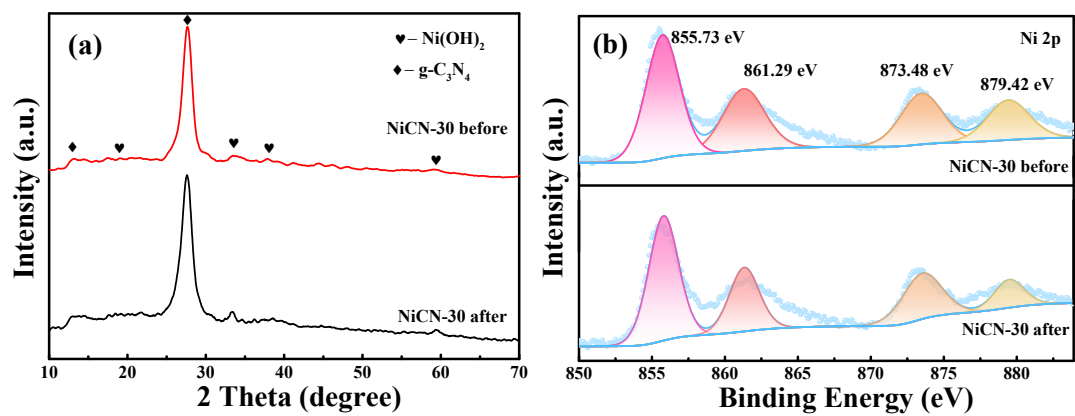

Fig. S4 XRD patterns (a) and high-resolution XPS spectra of Ni 2p for NiCN-30 before and after reaction
